# Supplementary material
Source: Springer Nature journal article supplement (https://www.springermedizin.de/resource/supplementary/12993_2009_261_MOESM7_ESM.pdf/9617412)
Supplement: MOESM7 [file 9617412]

|                    | Sal          | M5           | M1.25       | W0.5         | W0.1         | M5 + W0.5    | M5 + W0.1   | M1.25 + W0.5 | M1.25 + W0.1 |
|--------------------|--------------|--------------|-------------|--------------|--------------|--------------|-------------|--------------|--------------|
| <i>Striatum</i>    |              |              |             |              |              |              |             |              |              |
| DA                 | 12237 ± 1673 | 9835 ± 1018  | 10212 ± 861 | 10678 ± 1402 | 11041 ± 1046 | 7549 ± 699 * | 10727 ± 910 | 15203 ± 910  | 11453 ± 1038 |
| DOPAC              | 1134 ± 197   | 1928 ± 564   | 1329 ± 362  | 1487 ± 268   | 1501 ± 195   | 4173 ± 417   | 1594 ± 314  | 2997 ± 493   | 2297 ± 483   |
| HVA                | 140 ± 14     | 196 ± 74     | 162 ± 15    | 119 ± 12     | 125 ± 15     | 150 ± 9      | 157 ± 12    | 167 ± 22     | 126 ± 5      |
| 5-HT               | 761 ± 130    | 759 ± 112    | 789 ± 128   | 653 ± 176    | 537 ± 44     | 527 ± 23     | 560 ± 82    | 486 ± 54     | 517 ± 44     |
| 5-HIAA             | 490 ± 67     | 559 ± 131    | 448 ± 102   | 533 ± 53     | 432 ± 52     | 580 ± 35     | 427 ± 37    | 489 ± 65     | 442 ± 79     |
| <i>Cortex</i>      |              |              |             |              |              |              |             |              |              |
| 5-HT               | 274 ± 13     | 258 ± 7      | 259 ± 11    | 298 ± 5      | 275 ± 21     | 200 ± 3      | 219 ± 82    | 219 ± 12     | 299 ± 15     |
| 5-HIAA             | 363 ± 5      | 307 ± 10     | 330 ± 14    | 327 ± 5      | 288 ± 28     | 227 ± 7      | 302 ± 21    | 326 ± 22     | 321 ± 25     |
| <i>Hippocampus</i> |              |              |             |              |              |              |             |              |              |
| 5-HT               | 1219 ± 324   | 1904 ± 223 * | 1830 ± 107  | 1154 ± 299   | 1855 ± 158   | 1445 ± 217   | 1335 ± 300  | 1666 ± 106   | 2128 ± 196   |
| 5-HIAA             | 473 ± 81     | 222 ± 63 *   | 102 ± 37 *  | 372 ± 89     | 286 ± 39     | 273 ± 19     | 397 ± 54    | 366 ± 60     | 318 ± 12     |
